# Supplementary material
Source: PubMed Central journal article supplement (PMC3271333)
Supplement: embor2011235s2.pdf [file embor2011235s2.pdf]

Manuscript EMBOR-2011-35494

## **Mdm2 associates with Ras-effector NORE1 to induce the degradation of oncoprotein HIPK1**

Deresa Lee, Sang-Joon Park, Ki Sa Sung, Jikyoung Park, Sean Bong Lee, Sang-Yoon Park, Hyo Jeong Lee, Jang-Won Ahn, So Jung Choi, Seok-Geun Lee, Sung-Hoon Kim, Duk-Hwan Kim, Jhingook Kim, Yongsok Kim and Cheol Yong Choi

*Corresponding author: Cheol Yong Choi, Sungkyunkwan University*

---

### **Review timeline:**

Resubmission date:

19 October 2011

Accepted:

15 November 2011

---

### **Transaction Report:**

No Peer Review Process File is available with this article, as the authors have chosen not to make the review process public in this case.
